1 **Three new genome assemblies support a rapid radiation in *Musa acuminata***  
2 **(wild banana)**

3 Rouard M <sup>1\*</sup>, Droc G <sup>2,3</sup>, Martin G <sup>2,3</sup>, Sardos J <sup>1</sup>, Hueber Y <sup>1</sup>, Guignon V <sup>1</sup>, Cenci A <sup>1</sup>, Geigle B  
4 <sup>4</sup>, Hibbins M S <sup>5</sup>, Yahiaoui N <sup>2,3</sup>, Baurens F-C <sup>2,3</sup>, Berry V <sup>6</sup>, Hahn M W <sup>5</sup>, D'Hont A <sup>2,3</sup> and  
5 Roux N <sup>1</sup>

6 <sup>1</sup> Bioersivity International, Parc Scientifique Agropolis II, 34397 Montpellier Cedex 5, France. <sup>2</sup>  
7 CIRAD, UMR AGAP, F-34398 Montpellier, France; <sup>3</sup>: AGAP, Univ Montpellier, CIRAD,  
8 INRA, Montpellier SupAgro, Montpellier, France; <sup>4</sup> Computomics GmbH, Tuebingen, Germany <sup>5</sup>  
9 Department of Biology and Department of Computer Science, Indiana University, Bloomington,  
10 Indiana <sup>6</sup> LIRMM, CNRS – Univ. Montpellier 2, 161 rue Ada, 34392 Montpellier Cedex 5,  
11 France.

12  
13 \*Corresponding author: Mathieu Rouard ([m.rouard@cgiar.org](mailto:m.rouard@cgiar.org))

14

15 **Key words:** Banana, *Musa ssp.*, Incomplete lineage sorting, Phylogenomics, Genome assembly

## 16 **Abstract**

17 Edible bananas result from interspecific hybridization between *Musa acuminata* and *Musa*  
18 *balbisiana*, as well as among subspecies in *M. acuminata*. Four particular *M. acuminata*  
19 subspecies have been proposed as the main contributors of edible bananas, all of which radiated  
20 in a short period of time in southeastern Asia. Clarifying the evolution of these lineages at a  
21 whole-genome scale is therefore an important step toward understanding the domestication and  
22 diversification of this crop. This study reports the *de novo* genome assembly and gene annotation  
23 of a representative genotype from three different subspecies of *M. acuminata*. These data are  
24 combined with the previously published genome of the fourth subspecies to investigate  
25 phylogenetic relationships and genome evolution. Analyses of shared and unique gene families  
26 reveal that the four subspecies are quite homogenous, with a core genome representing at least  
27 50% of all genes and very few *M. acuminata* species-specific gene families. Multiple alignments  
28 indicate high sequence identity between homologous single copy-genes, supporting the close  
29 relationships of these lineages. Interestingly, phylogenomic analyses demonstrate high levels of  
30 gene tree discordance, due to both incomplete lineage sorting and introgression. This pattern  
31 suggests rapid radiation within *Musa acuminata* subspecies that occurred after the divergence  
32 with *M. balbisiana*. Introgression between *M. a. ssp. malaccensis* and *M. a. ssp. burmannica* was  
33 detected across a substantial portion of the genome, though multiple approaches to resolve the  
34 subspecies tree converged on the same topology. To support future evolutionary and functional  
35 analyses, we introduce the PanMusa database, which enables researchers to exploration of  
36 individual gene families and trees.

## 37 **Background**

38 Bananas are among the most important staple crops cultivated worldwide in both the tropics and  
39 subtropics. The wild ancestors of bananas are native to the Malesian Region (including Malaysia  
40 and Indonesia) (Simmonds 1962) or to northern Indo-Burma (southwest China). Dating back to  
41 the early Eocene (Janssens et al. 2016), the genus *Musa* currently comprises 60 to 70 species  
42 divided into two sections, *Musa* and *Callimusa* (Häkkinen 2013). Most of modern cultivated  
43 bananas originated from natural hybridization between two species from the section *Musa*, *Musa*  
44 *acuminata*, which occurs throughout the whole southeast Asia region, and *Musa balbisiana*,  
45 which is constrained to an area going from east India to south China (Simmonds & Shepherd  
46 1955). While no subspecies have been defined so far in *M. balbisiana*, *M. acuminata* is further  
47 divided into multiple subspecies, among which at least four have been identified as contributors  
48 to the cultivated banana varieties, namely *banksii*, *zebrina*, *burmannica*, and *malaccensis*  
49 (reviewed in Perrier et al. 2011). These subspecies can be found in geographical areas that are  
50 mostly non-overlapping. *Musa acuminata* ssp. *banksii* is endemic to New Guinea. *M. a.* ssp.  
51 *zebrina* is found in Indonesia (Java island), *M. a.* ssp. *malaccensis* originally came from the  
52 Malay Peninsula (De Langhe et al. 2009; Perrier et al. 2011), while *M. a.* ssp. *burmannica* is  
53 from Burma (today's Myanmar) (Cheesman 1948).

54 While there are many morphological characters that differentiate *M. acuminata* from *M.*  
55 *balbisiana*, the subspecies of *M. acuminata* have only a few morphological differences between  
56 them. For instance, *M. a.* ssp. *burmannica* is distinguished by its yellowish and waxless foliage,  
57 light brown markings on the pseudostem, and by its compact pendulous bunch and strongly  
58 imbricated purple bracts. *M. a.* ssp. *banksii* exhibits slightly waxy leaf, predominantly brown-  
59 blackish pseudostems, large bunches with splayed fruits, and non-imbricated yellow bracts. *M. a.*  
60 ssp. *malaccensis* is strongly waxy with a horizontal bunch, and bright red non-imbricated bracts,  
61 while *M. a.* ssp. *zebrina* is characterized by dark red patches on its dark green leaves (Simmonds  
62 1956).

63 Previous studies based on a limited number of markers have been able to shed some light  
64 on the relationships among *M. acuminata* subspecies (Sardos et al. 2016; Christelová et al.  
65 2017). Phylogenetic studies have been assisted by the availability of the reference genome  
66 sequence for a representative of *M. acuminata* ssp. *malaccensis* (D'Hont et al. 2012; Martin et al.

67 2016) and a draft *M. balbisiana* genome sequence (Davey et al. 2013). However, the availability  
68 of large genomic datasets from multiple (sub)species are expected to improve the resolution of  
69 phylogenetic analyses, and thus to provide additional insights on species evolution and their  
70 specific traits (Bravo et al. 2018). This is especially true in groups where different segments of  
71 the genome have different evolutionary histories, as has been found in *Musaceae* (Christelová,  
72 Valárik, et al. 2011). Whole-genome analyses also make it much easier to distinguish among the  
73 possible causes of gene tree heterogeneity, especially incomplete lineage sorting (ILS) and  
74 hybridization (Folk et al. 2018).

75 Moreover, the availability of multiple reference genome sequences opens the way to so-  
76 called pangenome analyses, a concept coined by Tettelin et al. (2005). The pangenome is defined  
77 as the set of all gene families found among a set of phylogenetic lineages. It includes i) the core  
78 genome, which is the pool of genes common to all lineages, ii) the accessory genome, composed  
79 of genes absent in some lineages, and iii) the species-specific or individual-specific genome,  
80 formed by genes that are present in only a single lineage. Identifying specific compartments of  
81 the pangenome (such as the accessory genome) offers a way to detect important genetic  
82 differences that underlie molecular diversity and phenotypic variation (Morgante et al. 2007).

83 Here, we generated three *de novo* genomes for the subspecies *banksii*, *zebrina* and  
84 *burmannica*, and combined these with existing genomes for *M. acuminata* ssp. *malaccensis*  
85 (D’Hont et al. 2012) and *M. balbisiana* (Davey et al. 2013). We thus analyzed the whole genome  
86 sequences of five extant genotypes comprising the four cultivated bananas’ contributors from *M.*  
87 *acuminata*, i.e. the reference genome ‘DH Pahang’ belonging to *M. acuminata* ssp. *malaccensis*,  
88 ‘Banksii’ from *M. acuminata* ssp. *banksii*, ‘Maia Oa’ belonging to *M. acuminata* ssp. *zebrina*,  
89 and ‘Calcutta 4’ from *M. acuminata* ssp. *burmannica*, as well as *M. balbisiana* (i.e. ‘Pisang  
90 Klutuk Wulung’ or PKW). We carried out phylogenomic analyses that provided evolutionary  
91 insights into both the relationships and genomic changes among lineages in this clade. Finally,  
92 we developed a banana species-specific database to support the larger community interested in  
93 crop improvement.

## 94 **Results**

### 95 **Assembly and gene annotation**

96 We generated three *de novo* assemblies belonging to *M. acuminata* ssp. *banksii*, *M. a.* ssp.  
97 *zebrina* and *M. a.* ssp. *burmannica* (**S Table 1 & 2**). The number of predicted protein coding  
98 genes per genome within different genomes of *Musa* ranges from 32,692 to 45,069 (**S Table 4**).  
99 Gene number was similar for *M. a.* ssp. *malaccensis* ‘DH Pahang’, *M. balbisiana* ‘PKW’ and *M.*  
100 *a.* ssp. *banksii* ‘Banksii’ but higher in *M. a.* ssp. *zebrina* ‘Maia Oa’ and *M. a.* ssp. *burmannica*  
101 ‘Calcutta 4’. According to BUSCO (**S. Table 3**), the most complete gene annotations are ‘DH  
102 Pahang’ (96.5%), ‘Calcutta 4’ (74.2%) and ‘Banksii’ (72.5%), followed by ‘PKW’ (66.5%) and  
103 ‘Maia Oa’ (61.2%).

### 104 **Gene families**

105 The percentage of genes in orthogroups (OGs), which is a set of orthologs and recent paralogs  
106 (*i.e.* gene family), ranges from 74 in *M. a. zebrina* ‘Maia Oa’ to 89.3 in *M. a. malaccensis* ‘DH  
107 Pahang’ with an average of 79.8 (**Table 1**). Orthogroups have a median size of 4 genes and do  
108 not exceed 50 (**S. Table5**). A pangenome here was defined on the basis of the analysis of OGs in  
109 order to define the 1) core, 2) accessory, and 3) unique gene set(s). On the basis of the five  
110 genomes studied here, the pangenome embeds a total of 32,372 OGs composed of 155,222  
111 genes. The core genome is composed of 12,916 OGs (**Figure 1**). Among these, 8,030 are  
112 composed of only one sequence in each lineage (*i.e.* are likely single-copy orthologs). A set of  
113 1489 OGs are specific to all subspecies in *M. acuminata*, while the number of genes specific to  
114 each subspecies ranged from 14 in the *M. acuminata* ‘DH Pahang’ to 110 in *M. acuminata*  
115 ‘Banksii’ for a total of 272 genes across all genotypes. No significant enrichment for any Gene  
116 Ontology (GO) category was detected for subspecies-specific OGs (**S. data 1**).

### 117 **Variation in gene tree topologies**

118 Phylogenetic reconstruction performed with single-copy genes ( $n=8,030$ ) showed high levels of  
119 discordance among the different individual gene trees obtained, both at the nucleic acid and  
120 protein levels (**Figure 2A**). Considering *M. balbisiana* as outgroup, there are 15 possible  
121 bifurcating tree topologies relating the four *M. acuminata* subspecies. For all three partitions of  
122 the data - protein, CDS, and gene (including introns and UTRs) - we observed all 15 different

123 topologies (**Table 2**). We also examined topologies at loci that had bootstrap support greater than  
124 90 for all nodes, also finding all 15 different topologies (**Table 2**). Among trees constructed from  
125 whole genes, topologies ranged in frequency from 13.12% for the most common tree to 1.92%  
126 for the least common tree (**Table 2**) with an average length of the 1342 aligned nucleotide sites  
127 for CDS and 483 aligned sites for proteins. Based on these results, gene tree frequencies were  
128 used to calculate concordance factors on the most frequent CDS gene trees (**Table 2**),  
129 demonstrating that no split was supported by more than 30% of gene trees (**Figure 2B**).  
130 Therefore, in order to further gain insight into the subspecies phylogeny, we used a combination  
131 of different approaches described in the next section.

### 132 **Inference of a species tree**

133 We used three complementary methods to infer phylogenetic relationships among the sampled  
134 lineages. First, we concatenated nucleotide sequences from all single-copy genes (totaling  
135 11,668,507 bp). We used PHYML to compute a maximum likelihood tree from this alignment,  
136 which, as expected, provided a topology with highly supported nodes (**Figure 3A**). Note that this  
137 topology (denoted topology number 1 in **Table 2**) is not the same as the one previously proposed  
138 in the literature (denoted topology number 7 in **Table 2**) (**S. Figure 1 & 2**).

139 Next, we used a method explicitly based on individual gene tree topologies. ASTRAL  
140 (Mirarab & Warnow 2015) infers the species tree by using quartet frequencies found in gene  
141 trees. It is suitable for large datasets and was highlighted as one of the best methods to address  
142 challenging topologies with short internal branches and high levels of discordance (Shi & Yang  
143 2017). ASTRAL found the same topology using ML gene trees from single-copy genes obtained  
144 from protein sequences, CDSs, and genes (**Figure 3C**).

145 Finally, we ran a supertree approach implemented in PhySIC\_IST (Scornavacca et al.  
146 2008) on the single-copy genes and obtained again the same topology (**Figure 3B**). PhySIC\_IST  
147 first collapses poorly supported branches of the gene trees into polytomies, as well as conflicting  
148 branches of the gene trees that are only present in a small minority of the trees; it then searches  
149 for the most resolved supertree that does not contradict the signal present in the gene trees nor  
150 contains topological signal absent from those trees. Deeper investigation of the results revealed  
151 that ~ 66% of the trees were unresolved, 33% discarded (pruned or incorrectly rooted), and

152 therefore that the inference relied on fewer than 1% of the trees. Aiming to increase the number  
153 of genes used by PhySIC\_IST, we included multi-copy OGs of the core genome, as well as some  
154 OGs in the accessory genomes using the pipeline SSIMUL (Scornavacca et al. 2011). SSIMUL  
155 translates multi-labeled gene trees (MUL-trees) into trees having a single copy of each gene (X-  
156 trees), i.e. the type of tree usually expected in supertree inference. To do so, all individual gene  
157 trees were constructed on CDSs from OGs with at least 4 *M. acuminata* and *M. balbisiana* genes  
158 (n=18,069). SSIMUL first removed identical subtrees resulting from a duplication node in these  
159 trees, it then filtered out trees where duplicated parts induced contradictory rooted triples,  
160 keeping only coherent trees. These trees can then be turned into trees containing a single copy of  
161 each gene, either by pruning the smallest subtrees under each duplication node (leaving only  
162 orthologous nodes in the tree), or by extracting the topological signal induced by orthology  
163 nodes into a rooted triplet set, that is then turned back into an equivalent X-tree. Here we chose  
164 to use the pruning method to generate a dataset to be further analyzed with PhySIC\_IST, which  
165 lead to a subset of 14,507 gene trees representing 44% of the total number of OGs and an  
166 increase of 80% compared to the 8,030 single-copy OGs. This analysis returned a consensus  
167 gene tree with the same topology as both of the previous methods used here (**Figure 3B**).

### 168 **Evidence for introgression**

169 Although much of the discordance we observe is likely due to incomplete lineage sorting, we  
170 also tested for introgression between subspecies. The ABBA-BABA test (Green et al. 2010) was  
171 conducted to detect an excess of either ABBA or BABA sites (where “A” corresponds to the  
172 ancestral allele and “B” corresponds to the derived allele state) in a four-taxon phylogeny  
173 including three *M. acuminata* subspecies as ingroups and *M. balbisiana* as outgroup. Because  
174 there were five taxa to be tested, analyses were done with permutation of taxa denoted P1, P2  
175 and P3 and Outgroup (**Table 3**). Under the null hypothesis of ILS, an equal number of ABBA  
176 and BABA sites are expected. However, we always found an excess of sites grouping  
177 *malaccensis* (‘DH’) and *burmannica* (‘C4’) (**Table 3**). This indicates a history of introgression  
178 between these two lineages.

179 To test the direction of introgression, we applied the  $D_2$  test (Hibbins and Hahn,  
180 unpublished). While introgression between a pair of species (e.g. *malaccensis* and *burmannica*)  
181 always results in smaller genetic distances between them, the  $D_2$  test is based on the idea that

182 gene flow in the two alternative directions can also result in a change in genetic distance to other  
183 taxa not involved in the exchange (in this case, *banksii*). We computed the genetic distance  
184 between *banksii* and *burmannica* in gene trees where *malaccensis* and *banksii* are sister (denoted  
185  $d_{AC|A,B}$ ) and the genetic distance between *banksii* and *burmannica* in gene trees where  
186 *malaccensis* and *burmannica* are sister (denoted  $d_{AC|B,C}$ ). The test takes into account the genetic  
187 distance between the species not involved in the introgression (*banksii*) and the species involved  
188 in introgression that it is not most closely related to (*burmannica*). We identified 1454 and 281  
189 gene trees with  $d_{AC|A,B}=1.15$  and  $d_{AC|B,C} = 0.91$ , respectively, giving a significant positive  
190 value of  $D_2=0.23$  ( $P<0.001$  by permutation). These results support introgression from  
191 *malaccensis* into *burmannica*, though they do not exclude the presence of a lesser level of gene  
192 flow in the other direction.

### 193 **PanMusa, a database to explore individual OGs**

194 Since genes underlie traits and wild banana species showed a high level of incongruent gene tree  
195 topologies, access to a repertoire of individual gene trees is important. This was the rationale for  
196 constructing a database that provides access to gene families and individual gene family trees in  
197 *M. acuminata* and *M. balbisiana*. A set of web interfaces are available to navigate OGs that have  
198 been functionally annotated using GreenPhyl comparative genomics database (Rouard et al.  
199 2011). PanMusa shares most of the features available on GreenPhyl to display or export  
200 sequences, InterPro assignments, sequence alignments, and gene trees (**Figure 4**). In addition,  
201 new visualization tools were implemented, such as MSAViewer (Yachdav et al. 2016) and  
202 PhyD3 (Kreft et al. 2017) to view gene trees.

## 203 **Discussion**

### 204 ***M. acuminata* subspecies contain few subspecies-specific families**

205 In this study, we used a *de novo* approach to generate additional reference genomes for the three  
206 subspecies of *Musa acuminata*; all three are thought to have played significant roles as genetic  
207 contributors to the modern cultivars. Genome assemblies produced for this study differ in  
208 quality, but the estimation of genome assembly and gene annotation quality conducted with  
209 BUSCO suggests that they were sufficient to perform comparative analyses. Moreover, we  
210 observed that the number of genes grouped in OGs were relatively similar among subspecies,



211 indicating that the potential over-prediction of genes in ‘Maia Oa’ and ‘Calcutta 4’ was mitigated  
212 during the clustering procedure. Indeed, over-prediction in draft genomes is expected due to  
213 fragmentation, leading to an artefactual increase in the number of genes (Denton et al. 2014).

214 Although our study is based on one representative per subspecies, *Musa* appears to have a  
215 widely shared pangenome, with only a small number of subspecies-specific families identified.  
216 The pangenome analysis also reveals a large number of families shared only among subsets of  
217 species or subspecies (**Figure 1**); this “dispensable” genome is thought to contribute to diversity  
218 and adaptation (Tettelin et al. 2005; Kahlke et al. 2012). The small number of species-specific  
219 OGs in *Musa acuminata* also supports the recent divergence between all genotypes including the  
220 split between *M. acuminata* and *M. balbisiana*.

### 221 ***M. acuminata* subspecies show a high level of discordance between individual gene trees**

222 By computing gene trees with all single-copy genes OG, we found widespread discordance in  
223 gene tree topologies. Topological incongruence can be the result of incomplete lineage sorting,  
224 the misassignment of paralogs as orthologs, introgression, or horizontal gene transfer (Maddison  
225 1997). With the continued generation of phylogenomic datasets over the past dozen years,  
226 massive amounts of discordance have been reported, first in *Drosophila* (Pollard et al. 2006) and  
227 more recently in birds (Jarvis et al. 2014), mammals (Li et al. 2016; Shi & Yang 2018) and  
228 plants (Novikova et al. 2016; Pease et al. 2016; Choi et al. 2017; Copetti et al. 2017; Wu et al.  
229 2017). Due to the risk of hemiplasy in such datasets (Avice et al. 2008; Hahn & Nakhleh 2016),  
230 we determined that we could not accurately reconstruct either nucleotide substitutions or gene  
231 gains and losses among the genomes analyzed here.

232 In our case, the fact that all possible subspecies tree topologies occurred, and that ratios  
233 of minor trees at most nodes were equivalent to those expected under ILS, strongly suggests the  
234 presence of ILS (Hahn & Nakhleh 2016). Banana is a paleopolyploid plant that experienced  
235 three independent whole genome duplications (WGD), and some fractionation is likely still  
236 occurring (D’Hont et al. 2012) (**S. Table 6**). But divergence levels among the single-copy OGs  
237 were fairly consistent (**Figure 2A**), supporting the correct assignment of orthology among  
238 sequences. However, we did find evidence for introgression between *malaccensis* and  
239 *burmannica*, which contributed a small excess of sites supporting one particular discordant

240 topology (**Table 3**). This event is also supported by the geographical overlap in the distribution  
241 of these two subspecies (Perrier et al. 2011).

242 The species tree topology supported by all methods used here is different from the tree  
243 previously proposed in the literature (**S. Figure 1**). ‘Calcutta 4’ as representative of *M.*  
244 *acuminata* ssp. *burmannica* was placed sister to the other *Musa acuminata* genotypes in our  
245 study, whereas several studies have reported proximity between *burmannica* and *malaccensis*,  
246 here represented by ‘DH Pahang’ (Janssens et al. 2016; Christelová et al. 2017). Multiple  
247 previous studies have attempted to resolve the topology in the Musaceae, but did not include all  
248 subspecies considered here, and had very limited numbers of loci. In Christelova et al. (2011), a  
249 robust combined approach using maximum likelihood, maximum parsimony, and Bayesian  
250 inference was applied to 19 loci, but only *burmannica* and *zebrina* out of the four subspecies  
251 were included. Jarret et al. (1992) reported sister relationships between *malaccensis* and *banksii*  
252 on the basis of RFLP markers, but did not include any samples from *burmannica* and *zebrina*. It  
253 is worth noting that, on the bases of our resolved topology, introgression from *malaccensis* to  
254 *burmannica* was detected, and could explain the relationships described previously (Janssens et  
255 al. 2016; Sardos et al. 2016).

256 More strikingly considering previous phylogenetic hypotheses, *malaccensis* appeared  
257 most closely related to *banksii*, which is quite distinct from the other *M. acuminata* spp.  
258 (Simmonds & Weatherup 1990) and which used to be postulated as its own species based on its  
259 geographical area of distribution and floral diversity (Argent 1976). On the bases of genomic  
260 similarity, all our analyses support *M. acuminata* ssp. *banksii* as a subspecies of *M. acuminata*.

### 261 **Gene tree discordance supports rapid radiation of *Musa acuminata* subspecies**

262 In their evolutionary history, *Musa* species dispersed from ‘northwest to southeast’ into  
263 Southeast Asia (Janssens et al. 2016). Due to sea level fluctuations, Malesia (including the  
264 nations of Indonesia, Malaysia, Brunei, Singapore, the Philippines, and Papua New Guinea) is a  
265 complex geographic region, formed as the result of multiple fusions and subsequent isolation of  
266 different islands (Thomas et al. 2012; Janssens et al. 2016). Ancestors of the Callimusa section  
267 (of the *Musa* genus) started to radiate from the northern Indo-Burma region towards the rest of  
268 Southeast Asia ~30 MYA, while the ancestors of the *Musa* (formerly *Eumusa*/*Rhodochlamys*)  
269 section started to colonize the region ~10 MYA (Janssens et al. 2016). The divergence between

270 *M. acuminata* and *M. balbisiana* has been estimated to be ~5 MYA (Lescot et al. 2008).  
271 However, no accurate dating has yet been proposed for the divergence of the *Musa acuminata*  
272 subspecies. We hypothesize that after the speciation of *M. acuminata* and *M. balbisiana* (circa 5  
273 MYA) rapid diversification occurred within populations of *M. acuminata*. This hypothesis is  
274 consistent with the observed gene tree discordance and high levels of ILS. Such a degree of  
275 discordance may reflect a near-instantaneous radiation between all subspecies of *M. acuminata*.  
276 Alternatively, it could support the proposed hypothesis of divergence back in the northern part of  
277 Malesia during the Pliocene (Janssens et al. 2016), followed by introgression taking place among  
278 multiple pairs of species as detected between *malaccensis* and *burmannica*. While massive  
279 amounts of introgression can certainly mask the history of lineage splitting (Fontaine et al.  
280 2015), we did not find evidence for such mixing.

281 Interestingly, such a broad range of gene tree topologies due to ILS (and introgression)  
282 has also been observed in gibbons (Carbone et al. 2014; Veeramah et al. 2015; Shi & Yang  
283 2018) for which the area of distribution in tropical forests of Southeast Asia is actually  
284 overlapping the center of origin of wild bananas. Moreover, according to Carbone et al. (2014),  
285 gibbons also experienced a near-instantaneous radiation ~5 million years ago. It is therefore  
286 tempting to hypothesize that ancestors of wild bananas and ancestors of gibbons faced similar  
287 geographical isolation and had to colonize and adapt to similar ecological niches, leading to the  
288 observed patterns of incomplete lineage sorting.

289 In this study, we highlighted the phylogenetic complexity in a genome-wide dataset for  
290 *Musa acuminata* and *Musa balbisiana*, bringing additional insights to explain why the Musaceae  
291 phylogeny has remained controversial. Our work should enable researchers to make inferences  
292 about trait evolution, and ultimately should help support crop improvement strategies.

## 293 **Material and Methods**

### 294 **Plant material**

295 Banana leaf samples from accessions ‘Banksii’ (*Musa acuminata* ssp. *banksii*, PT-BA-00024),  
296 ‘Maia Oa’ (*Musa acuminata* ssp. *zebrina*, PT-BA-00182) and ‘Calcutta 4’ (*Musa acuminata* ssp.  
297 *burmannica*, PT-BA-00051) were supplied by the CRB-Plantes Tropicales Antilles CIRAD-  
298 INRA field collection based in Guadeloupe. Leaves were used for DNA extraction. Plant identity  
299 was verified at the subspecies level using SSR markers at the *Musa* Genotyping Centre (MGC,

300 Czech Republic) as described in (Christelová, Valarik, et al. 2011) and passport data of the plant  
301 is accessible in the Musa Germplasm Information System (Ruas et al. 2017). In addition, the  
302 representativeness of the genotypes of the four subspecies was verified on a set of 22 samples  
303 belonging to the same four *M. acuminata* subspecies of the study (**S. Figure 3**).

#### 304 **Sequencing and assembly**

305 Genomic DNA was extracted using a modified MATAB method (Risterucci et al. 2000) . DNA  
306 libraries were constructed and sequenced using the HiSeq2000 (Illumina) technology at BGI (**S.**  
307 **Table 1**). ‘Banksii’ was assembled using SoapDenovo (Luo et al. 2012), and PBJelly2 (English  
308 et al. 2012) was used for gap closing using PacBio data generated at the Norwegian Sequencing  
309 Center (NSC) with Pacific Biosciences RS II. ‘Maia Oa’ and ‘Calcutta 4’ were assembled using  
310 the MaSuRCA assembler (Zimin et al. 2013) (**S. Table 2**). Estimation of genome assembly  
311 completeness was assessed with BUSCO plant (Simão et al. 2015) (**S. Table 3**).

#### 312 **Gene annotation**

313 Gene annotation was performed on the obtained *de novo* assembly for ‘Banksii’, ‘Maia Oa’ and  
314 ‘Calcutta 4,’ as well as on the draft *Musa balbisiana* ‘PKW’ assembly (Davey et al, 2013) for  
315 consistency and because the published annotation was assessed as low quality. For structural  
316 annotation we used EuGene v4.2 (<http://eugene.toulouse.inra.fr/>) (Foissac et al. 2008) calibrated  
317 on *M. acuminata malaccensis* ‘DH Pahang’ reference genome v2, which produced similar results  
318 (e.g. number of genes, no missed loci, good specificity and sensitivity) as the official annotation  
319 (Martin et al. 2016). EuGene combined genotype-specific (or closely related) transcriptome  
320 assemblies, performed with Trinity v2.4 with RNAseq datasets (Sarah et al. 2016), to maximize  
321 the likelihood to have genotype-specific gene annotation (**S. Table 4**). The estimation of gene  
322 space completeness was assessed with Busco (**S. Table 3**). Because of its high quality and to  
323 avoid confusing the community, we did not perform a new annotation for the *M. a. malaccensis*  
324 ‘DH Pahang’ reference genome but used the released version 2. Finally, the functional  
325 annotation of plant genomes was performed by assigning their associated generic GO terms  
326 through the Blast2GO program (Conesa et al. 2005) combining BLAST results from UniProt (E-  
327 value 1e-5) (Magrane & Consortium 2011) (**S. Data 1**).

## 328 **Gene families**

329 Gene families were identified using OrthoFinder v1.1.4 (Emms & Kelly 2015) with default  
330 parameters based on BLASTp (e-value 1e-5). Venn diagrams were made using JVenn online  
331 (<http://jvenn.toulouse.inra.fr>) (Bardou et al. 2014) and alternate visualization was produced with  
332 UpsetR (<https://gehlenborglab.shinyapps.io/upsetr>) (Lex et al. 2014).

## 333 **Tree topology from literature**

334 A species tree was initially identified based on previous studies (Sardos et al. 2016; Janssens et  
335 al. 2016). Those two studies included all *M. acuminata* subspecies, and had the same tree  
336 topology (**S. Figure 1**). In the first study, Sardos et al, (2016) computed a Neighbor-Joining tree  
337 from a dissimilarity matrix using bi-allelic GBS-derived SNP markers along the 11  
338 chromosomes of the *Musa* reference genome. Several representatives of each subspecies that  
339 comprised genebank accessions related to the genotypes used here were included (Sardos et al.  
340 2016). We annotated the tree to highlight the branches relevant to *M. acuminata* subspecies (**S.**  
341 **Figure 2**). In the second study, a maximum clade credibility tree of Musaceae was proposed  
342 based on four gene markers (*rps16*, *atpB-rbcL*, *trnL-F* and internal transcribed spacer, ITS)  
343 analyzed with Bayesian methods (Janssens et al. 2016).

## 344 **Genome-scale phylogenetic analyses and species tree**

345 Single-copy OGs (i.e. orthogroups with one copy of a gene in each of the five genotypes) from  
346 protein, coding DNA sequence (CDS), and genes (including introns and UTRs) were aligned  
347 with MAFFT v7.271 (Katoh & Standley 2013), and gene trees were constructed using PhyML  
348 v3.1 (Guindon et al. 2009) with ALrT branch support. All trees were rooted using *Musa*  
349 *balbisiana* as outgroup using Newick utilities v1.6 (Junier & Zdobnov 2010) (**S. Data 2**).  
350 Individual gene tree topologies were visualized as a cloudogram with DensiTree v2.2.5  
351 (Bouckaert 2010).

352 Single-copy OGs were further investigated with the quartet method implemented in  
353 ASTRAL v5.5.6 (Mirarab & Warnow 2015). In parallel, we carried out a Supertree approach  
354 following the SSIMUL procedure (<http://www.atgc-montpellier.fr/ssimul/>) (Scornavacca et al.  
355 2011) combined with PhySIC\_IST ([http://www.atgc-montpellier.fr/physic\\_ist/](http://www.atgc-montpellier.fr/physic_ist/)) (Scornavacca et  
356 al. 2008) applied to a set of rooted trees corresponding to core OGs (including single and

357 multiple copies), and accessory genes for which only one representative species was missing  
358 (except outgroup species). Finally, single-copy OGs (CDS only) were used to generate a  
359 concatenated genome-scale alignment with FASconCAT-G (Kück & Longo 2014) and a tree was  
360 constructed using PhyML (NNI, HKY85, 100 bootstrap).

### 361 **Search for introgression**

362 Ancient gene flow was assessed with the ABBA-BABA test or  $D$ -statistic (Green et al. 2010;  
363 Durand et al. 2011) and computed on the concatenated multiple alignment converted to the MVF  
364 format and processed with MVFtools (Pease & Rosenzweig 2017), similar to what is described  
365 in Wu et al. (2017) (<https://github.com/wum5/JaltPhylo>). The direction of introgression was  
366 further assessed with the  $D_2$  test (Hibbins and Hahn, unpublished). The  $D_2$  statistic captures  
367 differences in the heights of genealogies produced by introgression occurring in alternate  
368 directions by measuring the average divergence between species A and C in gene trees with an  
369 ((A,B),C) topology (denoted  $[d_{AC}|A,B]$ ), and subtracting the average A-C divergence in gene  
370 trees with a ((B,C),A) topology (denoted  $[d_{AC}|B,C]$ ), so that  $D_2 = (d_{AC}|A,B) - (d_{AC}|B,C)$ . If the  
371 statistic is significantly positive, it means that introgression has either occurred in the B→C  
372 direction or in both directions.  $D_2$  significance was assessed by permuting labels on gene trees  
373 1000 times and calculating  $P$ -values from the resulting null distribution of  $D_2$  values. The test  
374 was implemented with a Perl script using distmat from EMBOSS (Rice et al. 2000) with Tajima-  
375 Nei distance applied to multiple alignments associated with gene trees fitting the defined  
376 topologies above (<https://github.com/mrouard/perl-script-utils>).

## 377 **Data availability**

378 Raw sequence reads for *de novo* assemblies were deposited in the Sequence Read Archive (SRA)  
379 of the National Center for Biotechnology Information (NCBI) (BioProject: PRJNA437930 and  
380 SRA: SRP140622). Assembly and gene annotation data are available on the Banana Genome  
381 Hub (Droc et al, 2013) (<http://banana-genome-hub.southgreen.fr/species-list>). Cluster and gene  
382 tree results are available on a dedicated database (<http://panmusa.greenphyl.org>) hosted on the  
383 South Green Bioinformatics Platform (Guignon et al. 2016).

## 384 **Acknowledgments**

385 We thank Noel Chen and Qiongzhi He (BGI) for providing sequencing services with Illumina  
386 and Ave Tooming-Klunderud (CEES) for PacBio sequencing services and Computomics for  
387 support with assembly. We thank Erika Sallet (INRA) for providing early access to the new  
388 version of Eugene with helpful suggestions. We thank the CRB-Plantes Tropicales Antilles  
389 CIRAD-INRA for providing plant materials. We would like also to acknowledge Jae Young  
390 Choi (NYU), Steven Janssens (MBG), Laura Kubatko (OSU) for helpful discussions and advice  
391 on species tree topologies. This work was financially supported by CGIAR Fund Donors and  
392 CGIAR Research Programme on Roots, Tubers and Bananas (RTB) and technically supported  
393 by the high performance cluster of the UMR AGAP – CIRAD of the South Green Bioinformatics  
394 Platform (<http://www.southgreen.fr>).

395

## 396 **Authors contribution**

397 MR, NR and AD set up the study and MR coordinated the study. AD and FCB provided access  
398 to plant material and DNA. NY provided access to transcriptome data and GM to repeats library  
399 for gene annotation. BG performed assembly and gap closing. MR, GD, GM, YH, JS and AC  
400 performed analyses. VB, MSH, and MWH provided guidance on methods and helped with result  
401 interpretation. VG and MR set up the PanMusa website. MR wrote the manuscript with  
402 significant contributions from MWH, VB, and JS, and all co-authors commented on the  
403 manuscript

## 404 **Figures and Legends**

405 **Figure 1. Five-way Venn diagram showing the distribution of shared gene families** (at least  
406 two sequences per OG) among *M. a. banksii* 'Banksii', *M. a. zebrina* 'Maia Oa', *M. a.*  
407 *burmannica* 'Calcutta 4', *M. a. malaccensis* 'DH Pahang' and *M. balbisiana* 'PKW' genomes. On  
408 the right, number of orthologous groups by species and pangenome category. At the bottom,  
409 same dataset visualized with UpsetR (Lex et al. 2014).

410 **Figure 2. Illustration of gene tree discordance.** A) Cloudogram of single copy OGs (CDS)  
411 visualized with Densitree. The blue line represents the consensus tree as provided by Densitree  
412 B) Species tree with bootstrap-like support based on corresponding gene tree frequency from  
413 Table 2 (denoted topology number 2). (PKW = *M. balbisiana* 'PKW', C4 = *M. acuminata*  
414 *burmannica* 'Calcutta 4, M= *M. acuminata zebrina* 'Maia Oa', DH= *M. acuminata malaccensis*  
415 'DH Pahang', B = *M. acuminata banksii* 'Banksii')

416 **Figure 3. Species topologies computed with three different approaches** A) Maximum  
417 likelihood tree inferred from a concatenated alignment of single-copy genes (CDS). B)  
418 Supertree-based method applied to single and multi-labelled gene trees C) Quartet-based model  
419 applied to protein, CDS, and gene alignments.

420 **Figure 4. Overview of available interfaces for the PanMusa database.** A. Homepage of the  
421 website. B. List of functionally annotated OGs. C. Graphical representation of the number of  
422 sequence by species. D. Consensus InterPro domain schema by OG. E. Individual gene trees  
423 visualized with PhyD3. F. Multiple alignment of OG with MSViewer.

424 **Figure 5. Area of distribution of Musa species in Southeast Asia** as described by Perrier et al,  
425 2011; including species tree of *Musa acuminata* subspecies based on results described in Figure  
426 4. Areas of distribution are approximately represented by colors; hatched zone shows area of  
427 overlap between two subspecies where introgression may have occurred.



428 **Table 1. Summary of the gene clustering statistics per (sub)species.**

|                                         | <i>M.<br/>acuminata<br/>malaccensis</i><br>'DH<br>Pahang' | <i>M.<br/>acuminata<br/>burmannica</i><br>'Calcutta 4' | <i>M.<br/>acuminata<br/>banksii</i><br>'Banksii' | <i>M.<br/>acuminata<br/>zebrina</i><br>'Maia<br>Oa' | <i>M.<br/>balbiana</i><br>'PKW' |
|-----------------------------------------|-----------------------------------------------------------|--------------------------------------------------------|--------------------------------------------------|-----------------------------------------------------|---------------------------------|
| # genes                                 | 35,276                                                    | 45,069                                                 | 32,692                                           | 44,702                                              | 36,836                          |
| # genes in orthogroups                  | 31,501                                                    | 34,947                                                 | 26,490                                           | 33,059                                              | 29,225                          |
| # unassigned genes                      | 3,775                                                     | 10,122                                                 | 6,202                                            | 11,643                                              | 7,611                           |
| % genes in orthogroups                  | 89.3                                                      | 77.5                                                   | 81                                               | 74                                                  | 79.3                            |
| % unassigned genes                      | 10.7                                                      | 22.5                                                   | 19                                               | 26                                                  | 20.7                            |
| # orthogroups containing species        | 24,074                                                    | 26,542                                                 | 21,446                                           | 25,730                                              | 23,935                          |
| % orthogroups containing species        | 74.4                                                      | 82                                                     | 66.2                                             | 79.5                                                | 73.9                            |
| # species-specific orthogroups          | 6                                                         | 46                                                     | 47                                               | 11                                                  | 9                               |
| # genes in species-specific orthogroups | 14                                                        | 104                                                    | 110                                              | 23                                                  | 21                              |
| % genes in species-specific orthogroups | 0                                                         | 0.2                                                    | 0.3                                              | 0.1                                                 | 0.1                             |

429

430 **Table 2.** Frequency of gene tree topologies of the 8,030 single copy OGs. (PKW = *Musa balbisiana*  
 431 ‘PKW’, C4 = *Musa acuminata burmannica* ‘Calcutta 4, M= *Musa acuminata zebrina* ‘Maia Oa’, DH=  
 432 *Musa acuminata malaccensis* “DH Pahang’, B = *Musa acuminata banksii* ‘Banksii’). In bold the most  
 433 frequent topology.

| No. | Topology              | # CDS (%)   | # Protein (%) | # Gene (%)   | # Gene bootstrap >90 (%) |
|-----|-----------------------|-------------|---------------|--------------|--------------------------|
| 1   | (PKW,(C4,(M,(DH,B)))) | <b>11.9</b> | 10.58         | <b>13.12</b> | 13.72                    |
| 2   | (PKW,(C4,(DH,(B,M)))) | 10.8        | 10.48         | 11.92        | 14.88                    |
| 3   | (PKW,((DH,C4),(B,M))) | 9.59        | 7.28          | 12.73        | <b>17.52</b>             |
| 4   | (PKW,(M,(C4,(DH,B)))) | 9.53        | <b>12.51</b>  | 7.78         | 5.91                     |
| 5   | (PKW,(C4,(B,(DH,M)))) | 8.02        | 7.37          | 8.89         | 8.44                     |
| 6   | (PKW,((DH,B),(C4,M))) | 7.67        | 6.55          | 9.16         | 12.56                    |
| 7   | (PKW,(M,(B,(DH,C4)))) | 6.66        | 8.21          | 5            | 3.06                     |
| 8   | (PKW,(B,(M,(DH,C4)))) | 5.58        | 5.23          | 4.61         | 2.53                     |
| 9   | (PKW,(DH,(C4,(B,M)))) | 5.41        | 5.21          | 5.18         | 4.96                     |
| 10  | (PKW,(B,(C4,(DH,M)))) | 5.26        | 4.45          | 6.2          | 7.07                     |
| 11  | (PKW,(B,(DH,(C4,M)))) | 5.02        | 6.82          | 3.36         | 1.9                      |
| 12  | (PKW,(M,(DH,(B,C4)))) | 4.23        | 4.68          | 2.84         | 1.16                     |
| 13  | (PKW,((DH,M),(B,C4))) | 4.037       | 3.61          | 4.79         | 5.06                     |
| 14  | (PKW,(DH,(B,(C4,M)))) | 3.85        | 4.18          | 2.44         | 0.63                     |
| 15  | (PKW,(DH,(M,(B,C4)))) | 2.38        | 2.77          | 1.92         | 0.52                     |

434 **Table 3.** Four-taxon ABBA-BABA Test (*D*-statistic) used for introgression inference from the well-supported topology from Figure 3.

435 <sup>a</sup> Discordance = (ABBA + BABA) / Total <sup>b</sup>  $D = (ABBA - BABA) / (ABBA + BABA)$

| P1               | P2          | P3              | BBAA  | ABBA | BABA | Discordance <sup>a</sup> | <i>D</i> <sup>b</sup> | P-value |
|------------------|-------------|-----------------|-------|------|------|--------------------------|-----------------------|---------|
| Malaccensis (DH) | Banksii (B) | Burmannica (C4) | 12185 | 4289 | 8532 | 0.51                     | 0.33                  | 0       |
| Malaccensis (DH) | Zebrina (M) | Burmannica (C4) | 9622  | 5400 | 9241 | 0.6                      | 0.26                  | 0       |
| Zebrina (M)      | Banksii (B) | Burmannica (C4) | 11204 | 6859 | 6782 | 0.54                     | -0.005                | 0.5     |
| Malaccensis (DH) | Banksii (B) | Zebrina (M)     | 10450 | 7119 | 6965 | 0.57                     | -0.02                 | 0.19    |

436

437 **Additional information**

438 **S. Figure 1. Species tree of *Musa acuminata* subspecies extrapolated from literature review**

439 **S. Figure 2. Neighbor-Joining tree from 105 *M. acuminata* and cultivated accessions**

440 **S. Figure 3. Individual ancestries investigated with the Admixture software package**

441 **S. Table 1. Libraries used for the genome assemblies**

442 **S Table 2. Summary of the genome assembly**

443 **S. Table 3. Results of gene space assessment with BUSCO**

444 **S. Table 4. Summary of the genome annotation**

445 **S. Table 5. Global summary of the gene clustering**

446 **S. Table 6. List of 18 phylogenetic informative shared single copy nuclear genes from**  
447 **Duarte et al. 2010 mapped to *Musa* genomes.**

448 **S. Data 1. List of Gene ontology mapped by genomes**

449 **S. Data 2. List of gene trees obtained at protein-coding, CDS and gene based level**

## 450 **References**

- 451 Alexander DH, Lange K. 2011. Enhancements to the ADMIXTURE algorithm for individual  
452 ancestry estimation. *BMC Bioinformatics*. 12:246. doi: 10.1186/1471-2105-12-246.
- 453 Argent G. 1976. The wild bananas of Papua New Guinea. *Notes Roy Bot Gard Edinb.* 35:77–  
454 114.
- 455 Avise JC, Robinson TJ, Kubatko L. 2008. Hemi-plasy: A New Term in the Lexicon of  
456 Phylogenetics. *Syst. Biol.* 57:503–507. doi: 10.1080/10635150802164587.
- 457 Bardou P, Mariette J, Escudié F, Djemiel C, Klopp C. 2014. jvenn: an interactive Venn diagram  
458 viewer. *BMC Bioinformatics*. 15:293. doi: 10.1186/1471-2105-15-293.
- 459 Bouckaert RR. 2010. DensiTree: making sense of sets of phylogenetic trees. *Bioinformatics*.  
460 26:1372–1373. doi: 10.1093/bioinformatics/btq110.
- 461 Bravo GA et al. 2018. *Embracing heterogeneity: Building the Tree of Life and the future of*  
462 *phylogenomics*. PeerJ Inc. doi: 10.7287/peerj.preprints.26449v3.
- 463 Carbone L et al. 2014. Gibbon genome and the fast karyotype evolution of small apes. *Nature*.  
464 513:195–201. doi: 10.1038/nature13679.
- 465 Cheesman EE. 1948. Classification of the Bananas. *Kew Bull.* 3:17–28. doi: 10.2307/4118909.
- 466 Choi JY et al. 2017. The Rice Paradox: Multiple Origins but Single Domestication in Asian Rice.  
467 *Mol. Biol. Evol.* 34:969–979. doi: 10.1093/molbev/msx049.
- 468 Christelová P, Valarik M, et al. 2011. A platform for efficient genotyping in Musa using  
469 microsatellite markers. *AoB Plants*. 2011:plr024–plr024. doi: 10.1093/aobpla/plr024.
- 470 Christelová P et al. 2017. Molecular and cytological characterization of the global Musa  
471 germplasm collection provides insights into the treasure of banana diversity. *Biodivers. Conserv.*  
472 26:801–824. doi: 10.1007/s10531-016-1273-9.
- 473 Christelová P, Valárik M, Hřibová E, De Langhe E, Doležel J. 2011. A multi gene sequence-  
474 based phylogeny of the Musaceae (banana) family. *BMC Evol. Biol.* 11:103. doi: 10.1186/1471-  
475 2148-11-103.
- 476 Conesa A et al. 2005. Blast2GO: a universal tool for annotation, visualization and analysis in  
477 functional genomics research. *Bioinforma. Oxf. Engl.* 21:3674–3676. doi:  
478 10.1093/bioinformatics/bti610.
- 479 Copetti D et al. 2017. Extensive gene tree discordance and hemiplasy shaped the genomes of  
480 North American columnar cacti. *Proc. Natl. Acad. Sci.* 114:12003–12008. doi:  
481 10.1073/pnas.1706367114.

- 482 Dagan T, Martin W. 2006. The tree of one percent. *Genome Biol.* 7:118. doi: 10.1186/gb-2006-  
483 7-10-118.
- 484 Davey MW et al. 2013. A draft *Musa balbisiana* genome sequence for molecular genetics in  
485 polyploid, inter- and intra-specific *Musa* hybrids. *BMC Genomics.* 14:683. doi: 10.1186/1471-  
486 2164-14-683.
- 487 De Langhe E et al. 2009. Why Bananas Matter: An introduction to the history of banana  
488 domestication. *Ethnobot. Res. Appl.* 7:165–177. doi: 10.17348/era.7.0.165-177.
- 489 Denton JF et al. 2014. Extensive Error in the Number of Genes Inferred from Draft Genome  
490 Assemblies. *PLOS Comput. Biol.* 10:e1003998. doi: 10.1371/journal.pcbi.1003998.
- 491 D’Hont A et al. 2012. The banana (*Musa acuminata*) genome and the evolution of  
492 monocotyledonous plants. *Nature.* doi: 10.1038/nature11241.
- 493 Durand EY, Patterson N, Reich D, Slatkin M. 2011. Testing for Ancient Admixture between  
494 Closely Related Populations. *Mol. Biol. Evol.* 28:2239–2252. doi: 10.1093/molbev/msr048.
- 495 Emms DM, Kelly S. 2015. OrthoFinder: solving fundamental biases in whole genome  
496 comparisons dramatically improves orthogroup inference accuracy. *Genome Biol.* 16:157. doi:  
497 10.1186/s13059-015-0721-2.
- 498 English AC et al. 2012. Mind the Gap: Upgrading Genomes with Pacific Biosciences RS Long-  
499 Read Sequencing Technology. *PLOS ONE.* 7:e47768. doi: 10.1371/journal.pone.0047768.
- 500 Foissac S et al. 2008. Genome Annotation in Plants and Fungi: EuGene as a Model Platform.  
501 *Curr. Bioinforma.* <http://www.eurekaselect.com/82677/article> (Accessed March 1, 2018).
- 502 Folk Ryan A., Soltis Pamela S., Soltis Douglas E., Guralnick Robert. 2018. New prospects in the  
503 detection and comparative analysis of hybridization in the tree of life. *Am. J. Bot.* 0. doi:  
504 10.1002/ajb2.1018.
- 505 Fontaine MC et al. 2015. Extensive introgression in a malaria vector species complex revealed  
506 by phylogenomics. *Science.* 347:1258524. doi: 10.1126/science.1258524.
- 507 Guignon V et al. 2016. The South Green portal: A comprehensive resource for tropical and  
508 Mediterranean crop genomics. *Curr. Plant Biol.* 7:6–9.
- 509 Guindon S, Delsuc F, Dufayard J-F, Gascuel O. 2009. Estimating maximum likelihood  
510 phylogenies with PhyML. *Methods Mol. Biol. Clifton NJ.* 537:113–137. doi: 10.1007/978-1-  
511 59745-251-9\_6.
- 512 Hahn MW, Nakhleh L. 2016. Irrational exuberance for resolved species trees. *Evol. Int. J. Org.*  
513 *Evol.* 70:7–17. doi: 10.1111/evo.12832.

- 514 Janssens SB et al. 2016. Evolutionary dynamics and biogeography of Musaceae reveal a  
515 correlation between the diversification of the banana family and the geological and climatic  
516 history of Southeast Asia. *New Phytol.* 210:1453–1465. doi: 10.1111/nph.13856.
- 517 Jarret R, Gawel N, Whittemore A, Sharrock S. 1992. RFLP-based phylogeny of *Musa* species in  
518 Papua New Guinea. *Theor. Appl. Genet.* 84–84. doi: 10.1007/BF00224155.
- 519 Jarvis ED et al. 2014. Whole-genome analyses resolve early branches in the tree of life of  
520 modern birds. *Science.* 346:1320–1331. doi: 10.1126/science.1253451.
- 521 Junier T, Zdobnov EM. 2010. The Newick utilities: high-throughput phylogenetic tree  
522 processing in the UNIX shell. *Bioinforma. Oxf. Engl.* 26:1669–1670. doi:  
523 10.1093/bioinformatics/btq243.
- 524 Katoh K, Standley DM. 2013. MAFFT multiple sequence alignment software version 7:  
525 improvements in performance and usability. *Mol. Biol. Evol.* 30:772–780. doi:  
526 10.1093/molbev/mst010.
- 527 Kreft L, Botzki A, Coppens F, Vandepoele K, Van Bel M. 2017. PhyD3: a phylogenetic tree  
528 viewer with extended phyloXML support for functional genomics data visualization.  
529 *Bioinforma. Oxf. Engl.* doi: 10.1093/bioinformatics/btx324.
- 530 Kück P, Longo GC. 2014. FASconCAT-G: extensive functions for multiple sequence alignment  
531 preparations concerning phylogenetic studies. *Front. Zool.* 11:81. doi: 10.1186/s12983-014-  
532 0081-x.
- 533 Lescot M et al. 2008. Insights into the *Musa* genome: Syntenic relationships to rice and between  
534 *Musa* species. *BMC Genomics.* 9:58. doi: 10.1186/1471-2164-9-58.
- 535 Lex A, Gehlenborg N, Strobel H, Vuillemot R, Pfister H. 2014. UpSet: Visualization of  
536 Intersecting Sets. *IEEE Trans. Vis. Comput. Graph.* 20:1983–1992. doi:  
537 10.1109/TVCG.2014.2346248.
- 538 Li G, Davis BW, Eizirik E, Murphy WJ. 2016. Phylogenomic evidence for ancient hybridization  
539 in the genomes of living cats (Felidae). *Genome Res.* 26:1–11. doi: 10.1101/gr.186668.114.
- 540 Luo R et al. 2012. SOAPdenovo2: an empirically improved memory-efficient short-read de novo  
541 assembler. *GigaScience.* 1:18. doi: 10.1186/2047-217X-1-18.
- 542 Maddison WP. 1997. Gene Trees in Species Trees. *Syst. Biol.* 46:523–536. doi:  
543 10.1093/sysbio/46.3.523.
- 544 Magrane M, Consortium U. 2011. UniProt Knowledgebase: a hub of integrated protein data.  
545 *Database J. Biol. Databases Curation.* 2011. doi: 10.1093/database/bar009.

- 546 Martin G et al. 2016. Improvement of the banana “*Musa acuminata*” reference sequence using  
547 NGS data and semi-automated bioinformatics methods. *BMC Genomics*. 17:243. doi:  
548 10.1186/s12864-016-2579-4.
- 549 Medini D, Donati C, Tettelin H, Massignani V, Rappuoli R. 2005. The microbial pan-genome.  
550 *Curr. Opin. Genet. Dev.* 15:589–594. doi: 10.1016/j.gde.2005.09.006.
- 551 Mirarab S, Warnow T. 2015. ASTRAL-II: coalescent-based species tree estimation with many  
552 hundreds of taxa and thousands of genes. *Bioinforma. Oxf. Engl.* 31:i44-52. doi:  
553 10.1093/bioinformatics/btv234.
- 554 Morgante M, De Paoli E, Radovic S. 2007. Transposable elements and the plant pan-genomes.  
555 *Curr. Opin. Plant Biol.* 10:149–155. doi: 10.1016/j.pbi.2007.02.001.
- 556 Novikova PY et al. 2016. Sequencing of the genus *Arabidopsis* identifies a complex history of  
557 nonbifurcating speciation and abundant trans-specific polymorphism. *Nat. Genet.* 48:1077–1082.  
558 doi: 10.1038/ng.3617.
- 559 Pease J, Rosenzweig B. 2017. Encoding Data Using Biological Principles: the Multisample  
560 Variant Format for Phylogenomics and Population Genomics. *IEEE/ACM Trans. Comput. Biol.*  
561 *Bioinform.* PP:1–1. doi: 10.1109/TCBB.2015.2509997.
- 562 Pease JB, Haak DC, Hahn MW, Moyle LC. 2016. Phylogenomics Reveals Three Sources of  
563 Adaptive Variation during a Rapid Radiation. *PLOS Biol.* 14:e1002379. doi:  
564 10.1371/journal.pbio.1002379.
- 565 Perrier X et al. 2011. Multidisciplinary perspectives on banana (*Musa* spp.) domestication. *Proc.*  
566 *Natl. Acad. Sci.* doi: 10.1073/pnas.1102001108.
- 567 Pollard DA, Iyer VN, Moses AM, Eisen MB. 2006. Widespread Discordance of Gene Trees with  
568 Species Tree in *Drosophila*: Evidence for Incomplete Lineage Sorting. *PLOS Genet.* 2:e173. doi:  
569 10.1371/journal.pgen.0020173.
- 570 Rice P, Longden I, Bleasby A. 2000. EMBOSS: the European Molecular Biology Open Software  
571 Suite. *Trends Genet. TIG.* 16:276–277.
- 572 Risterucci AM et al. 2000. A high-density linkage map of *Theobroma*  
573 *cacao* L. *Theor. Appl. Genet.* 101:948–955. doi: 10.1007/s001220051566.
- 574 Rouard M et al. 2011. GreenPhylDB v2.0: comparative and functional genomics in plants.  
575 *Nucleic Acids Res.* 39:D1095-1102. doi: 10.1093/nar/gkq811.
- 576 Ruas M et al. 2017. MGIS: managing banana (*Musa* spp.) genetic resources information and  
577 high-throughput genotyping data. *Database.* 2017. doi: 10.1093/database/bax046.



- 578 Sarah G et al. 2016. A large set of 26 new reference transcriptomes dedicated to comparative  
579 population genomics in crops and wild relatives. *Mol. Ecol. Resour.* doi: 10.1111/1755-  
580 0998.12587.
- 581 Sardos Julie et al. 2016. A Genome-Wide Association Study on the Seedless Phenotype in  
582 Banana (*Musa* spp.) Reveals the Potential of a Selected Panel to Detect Candidate Genes in a  
583 Vegetatively Propagated Crop. *PLOS ONE*. 11:e0154448. doi: 10.1371/journal.pone.0154448.
- 584 Sardos J. et al. 2016. DArT whole genome profiling provides insights on the evolution and  
585 taxonomy of edible Banana (*Musa* spp.). *Ann. Bot.* mcw170. doi: 10.1093/aob/mcw170.
- 586 Scornavacca C, Berry V, Lefort V, Douzery EJ, Ranwez V. 2008. PhySIC\_IST: cleaning source  
587 trees to infer more informative supertrees. *BMC Bioinformatics*. 9:413. doi: 10.1186/1471-2105-  
588 9-413.
- 589 Scornavacca C, Berry V, Ranwez V. 2011. Building species trees from larger parts of  
590 phylogenomic databases. *Inf. Comput.* 209:590–605. doi: 10.1016/j.ic.2010.11.022.
- 591 Shi C-M, Yang Z. 2017. Coalescent-based analyses of genomic sequence data provide a robust  
592 resolution of phylogenetic relationships among major groups of gibbons. *Mol. Biol. Evol.* doi:  
593 10.1093/molbev/msx277.
- 594 Shi C-M, Yang Z. 2018. Coalescent-Based Analyses of Genomic Sequence Data Provide a  
595 Robust Resolution of Phylogenetic Relationships among Major Groups of Gibbons. *Mol. Biol.*  
596 *Evol.* 35:159–179. doi: 10.1093/molbev/msx277.
- 597 Simão FA, Waterhouse RM, Ioannidis P, Kriventseva EV, Zdobnov EM. 2015. BUSCO:  
598 assessing genome assembly and annotation completeness with single-copy orthologs.  
599 *Bioinformatics*. 31:3210–3212. doi: 10.1093/bioinformatics/btv351.
- 600 Simmonds NW. 1956. Botanical Results of the Banana Collecting Expedition, 1954-5. *Kew*  
601 *Bull.* 11:463–489. doi: 10.2307/4109131.
- 602 Simmonds NW. 1962. *The evolution of the bananas*. Longmans: London (GBR).
- 603 Simmonds NW, Shepherd K. 1955. The taxonomy and origins of the cultivated bananas. *J. Linn.*  
604 *Soc. Lond. Bot.* 55:302–312. doi: 10.1111/j.1095-8339.1955.tb00015.x.
- 605 Simmonds NW, Weatherup STC. 1990. Numerical taxonomy of the wild bananas (*Musa*). *New*  
606 *Phytol.* 115:567–571. doi: 10.1111/j.1469-8137.1990.tb00485.x.
- 607 Tettelin H et al. 2005. Genome analysis of multiple pathogenic isolates of *Streptococcus*  
608 *agalactiae*: Implications for the microbial “pan-genome”. *Proc. Natl. Acad. Sci. U. S. A.*  
609 102:13950–13955. doi: 10.1073/pnas.0506758102.

- 610 Thomas DC et al. 2012. West to east dispersal and subsequent rapid diversification of the mega-  
611 diverse genus *Begonia* (Begoniaceae) in the Malesian archipelago. *J. Biogeogr.* 39:98–113. doi:  
612 10.1111/j.1365-2699.2011.02596.x.
- 613 Veeramah KR et al. 2015. Examining Phylogenetic Relationships Among Gibbon Genera Using  
614 Whole Genome Sequence Data Using an Approximate Bayesian Computation Approach.  
615 *Genetics.* 200:295–308. doi: 10.1534/genetics.115.174425.
- 616 Wu M, Kostyun JL, Hahn MW, Moyle L. 2017. Dissecting the basis of novel trait evolution in a  
617 radiation with widespread phylogenetic discordance. *bioRxiv.* 201376. doi: 10.1101/201376.
- 618 Yachdav G et al. 2016. MSAViewer: interactive JavaScript visualization of multiple sequence  
619 alignments. *Bioinforma. Oxf. Engl.* 32:3501–3503. doi: 10.1093/bioinformatics/btw474.
- 620 Zimin AV et al. 2013. The MaSuRCA genome assembler. *Bioinformatics.* 29:2669–2677. doi:  
621 10.1093/bioinformatics/btt476.
- 622

Malaccensis (DH)

Banksii (B)

Zebrina (M)

Balbisiana (PKW)

Burmannica (C4)

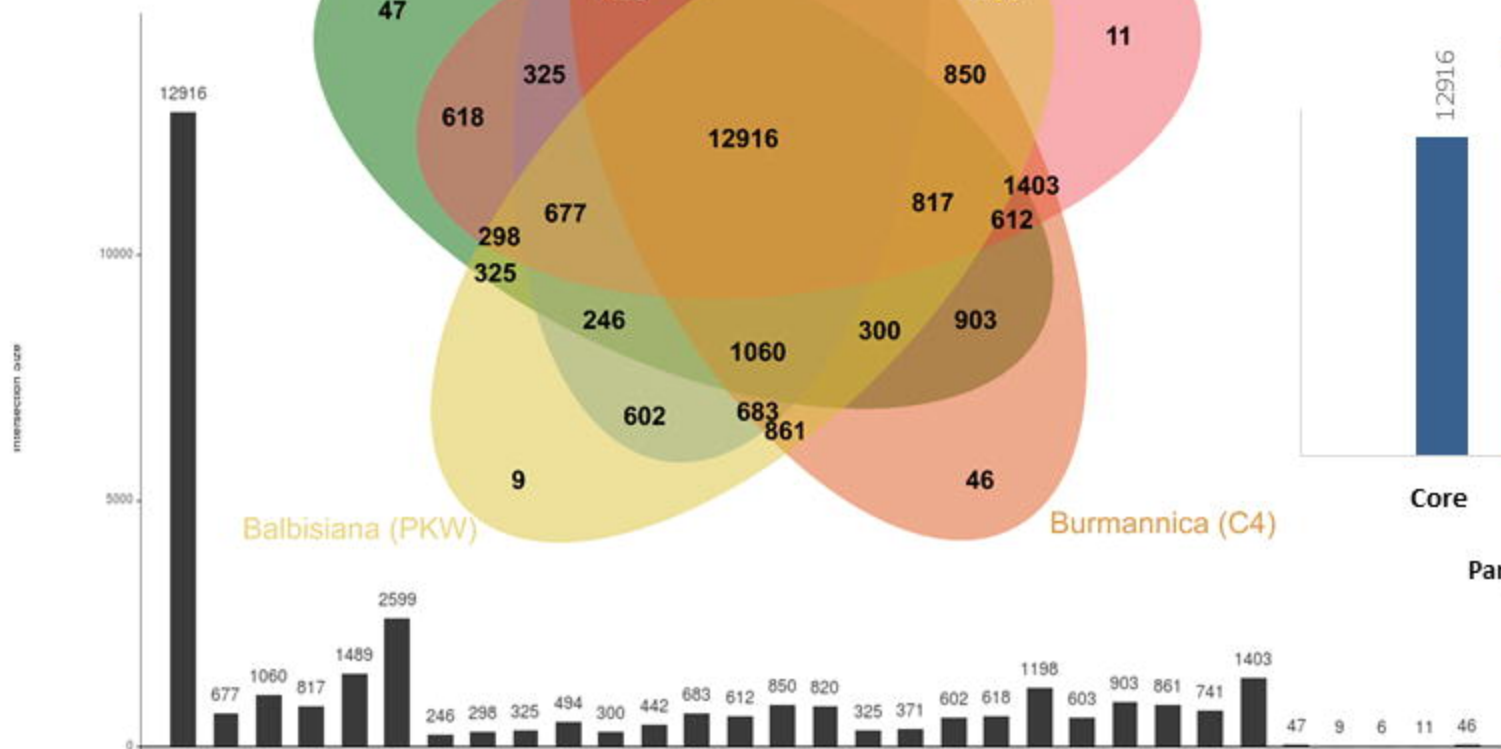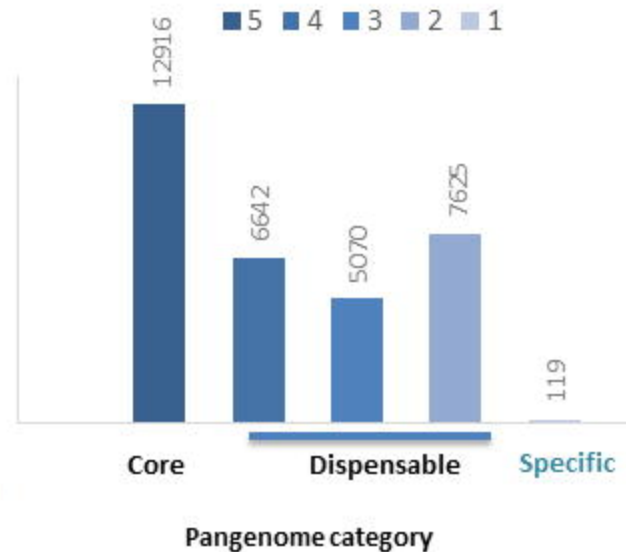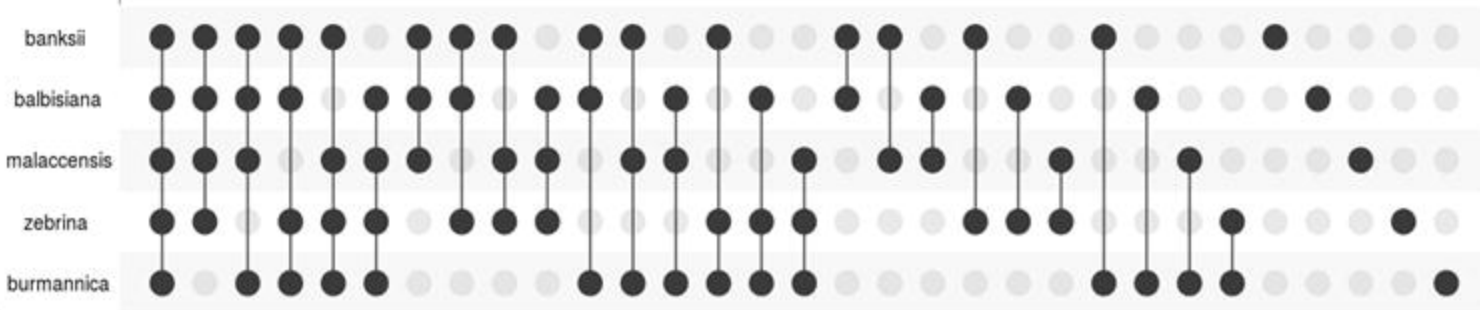

**A**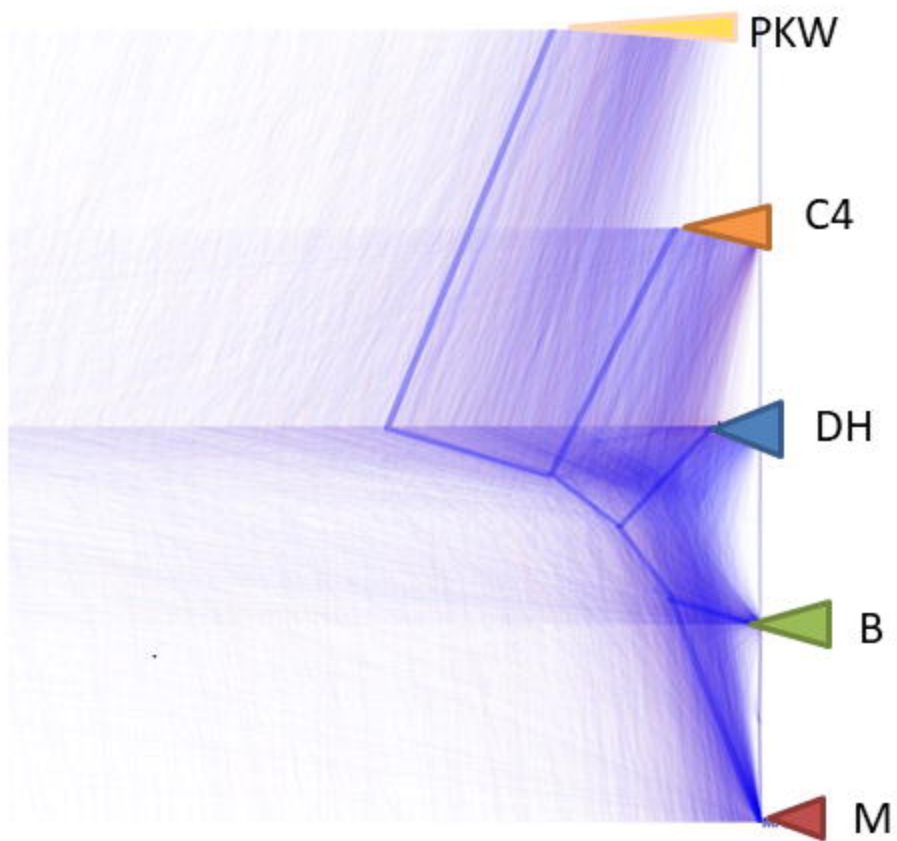**B**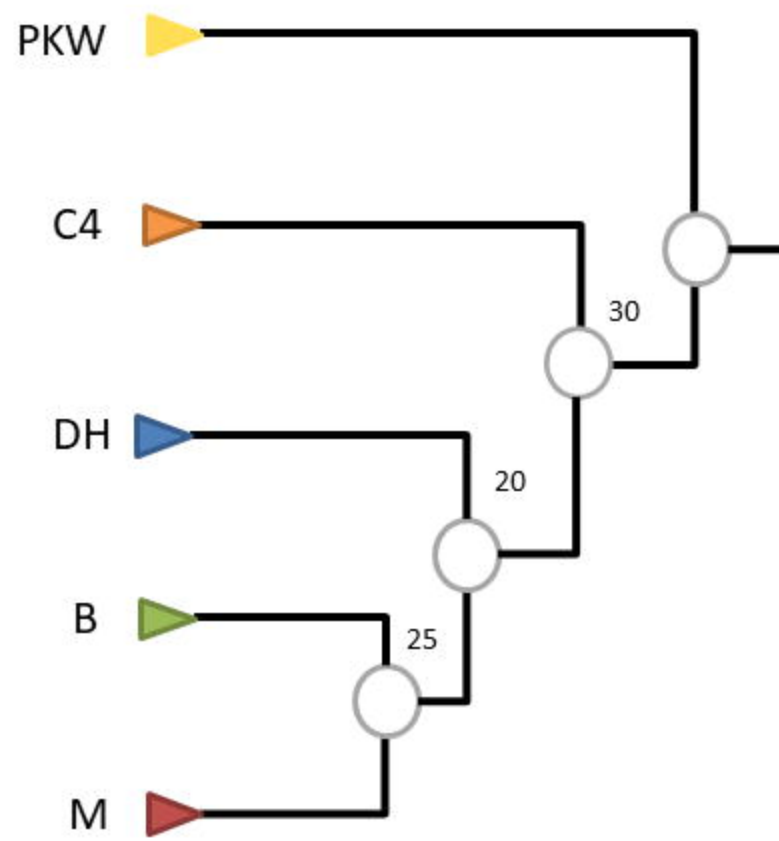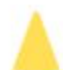*M. balbisiiana* 'Pkw'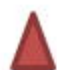*M. a. zebrina* 'Maia Oa'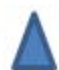*M. a. malaccensis* 'DHPahang'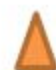*M. a. burmannica* 'Calcutta 4'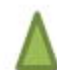*M. a. banksii* 'Banksii'

**A Concatenation based**

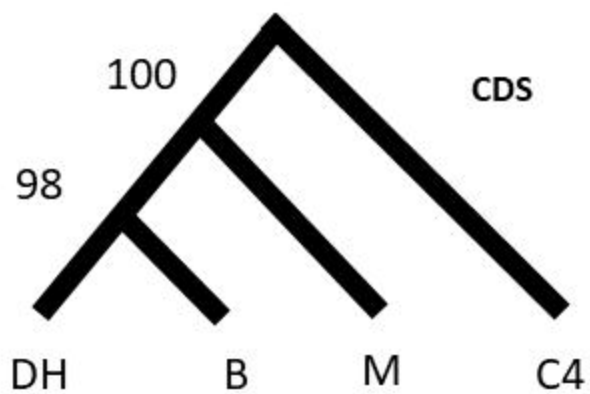

**B Supertree based**

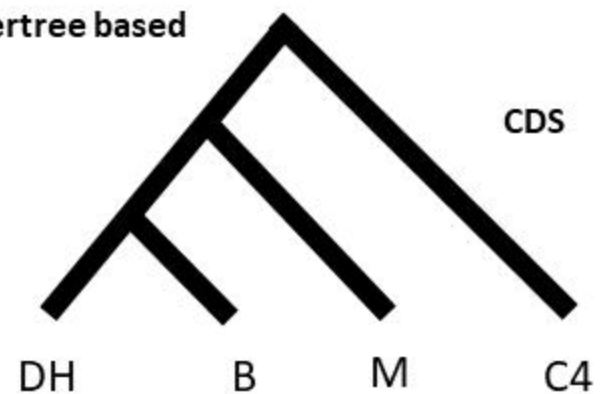

**C Quartet based**

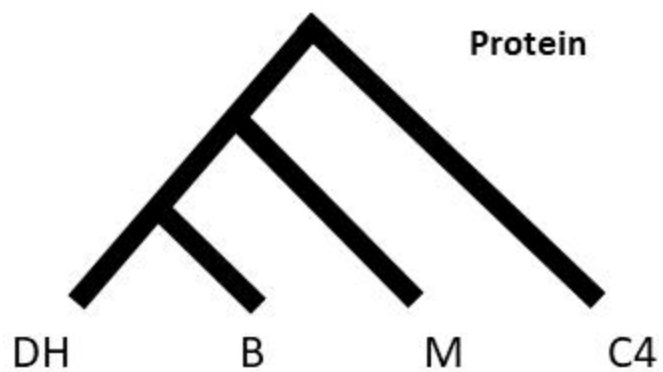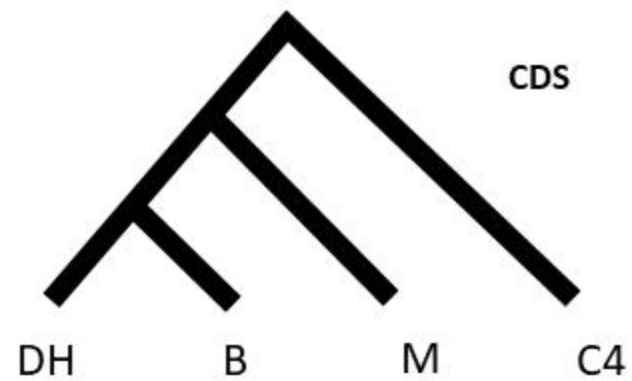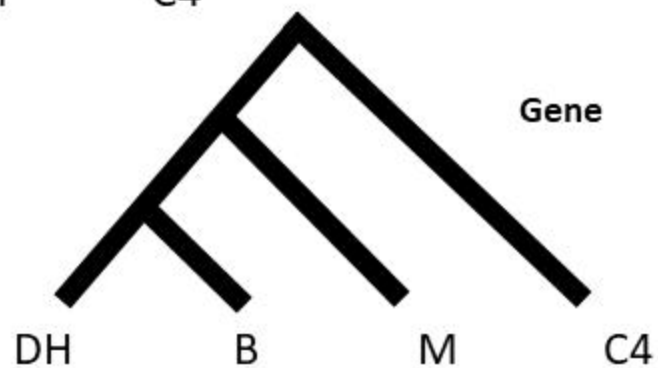

**PanMusa**

Enter your text to search here

Home Search Gene Family lists Toolbox Documentation Statistics My Space

**A**

PanMusa is a web resource designed for comparative and functional genomics in the Musaceae that includes Bananas (*Musa spp.*). The database contains a catalogue of gene families based on protein coding genes from representative of the 4 ancestral pools of *M. acuminata* (i.e. 'DH Pahang', 'Banksi', 'Musa Oa' and 'Calcutta 4') and *M. balbisiana* (i.e. 'Pisang Klutuk Wulung' abbrev PKW).

**Information**

- PanMusa version launched

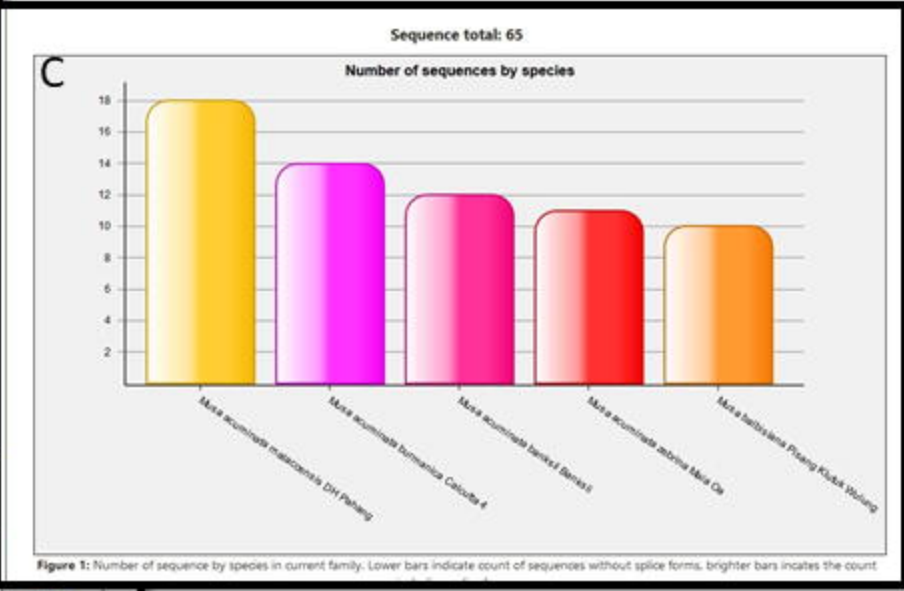

Number of clusters: 32372

**B**

| Family Id | Family Name                 | Number of sequences | Status                               |
|-----------|-----------------------------|---------------------|--------------------------------------|
| OG0000000 | Unannotated cluster         | 134                 | <span style="color: green;">●</span> |
| OG0000001 | Actin and Actin-like family | 104                 | <span style="color: green;">●</span> |
| OG0000006 | Unannotated cluster         | 68                  | <span style="color: green;">●</span> |
| OG0000007 | ATPase transporter family   |                     |                                      |
| OG0000008 | Tubulin family              |                     |                                      |
| OG0000013 | Unannotated cluster         |                     |                                      |

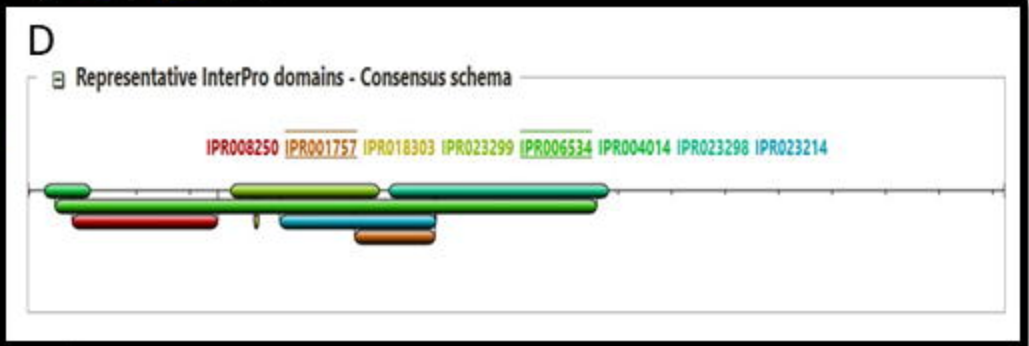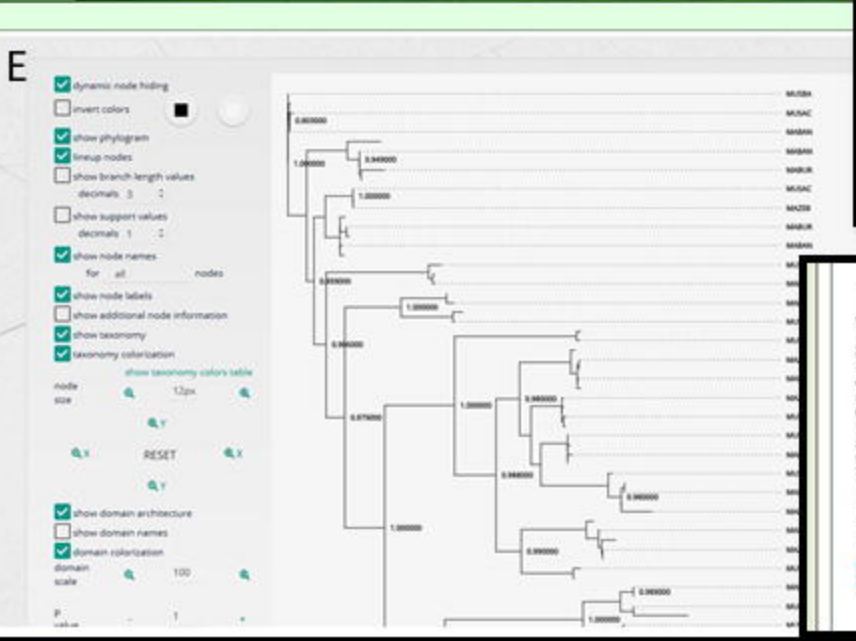

**F**

Label

|    |      |        |     |   |   |   |   |   |   |   |   |   |   |   |   |   |   |   |   |   |   |   |   |   |   |   |   |   |   |   |   |   |   |   |   |   |   |   |   |   |   |   |   |   |   |   |   |   |   |   |   |   |   |   |   |   |
|----|------|--------|-----|---|---|---|---|---|---|---|---|---|---|---|---|---|---|---|---|---|---|---|---|---|---|---|---|---|---|---|---|---|---|---|---|---|---|---|---|---|---|---|---|---|---|---|---|---|---|---|---|---|---|---|---|---|
| 1  | Ma01 | p00590 | MAA | I | S | L | D | E | I | K | N | E | T | V | D | L | E | R | I | P | I | E | V | F | E | Q | L | K | C | T | R | E | G | L | S | L | T | E | G | A | N | K | L | Q | I | F | G | P | N | K | L | E | E | K |   |   |
| 2  | Ma02 | p06820 | MAA | I | S | L | D | E | I | K | N | E | T | V | D | L | E | R | I | P | V | D | E | V | F | E | Q | L | K | C | T | R | E | G | L | S | S | A | E | G | A | N | K | L | Q | I | F | G | P | N | K | L | E | E | K |   |
| 3  | Ma03 | p04410 | M   | - | - | D | L | E | Q | I | K | N | E | V | D | L | E | R | I | P | V | D | E | V | F | E | Q | L | K | C | S | E | N | O | L | T | S | A | E | G | E | Q | L | Q | I | F | G | L | N | K | L | E | E | K |   |   |
| 4  | Ma03 | p13010 | M   | - | A | I | S | L | E | E | I | K | N | D | A | V | D | L | E | H | I | P | V | D | E | V | F | E | Q | L | K | C | D | N | O | L | T | N | V | E | G | E | N | K | I | F | G | L | N | K | L | E | E | K |   |   |
| 5  | Ma03 | p29190 | MAA | I | S | L | D | E | I | K | N | E | T | V | D | L | E | R | I | P | I | E | V | F | E | Q | L | K | C | T | K | Q | L | S | S | E | E | G | A | S | R | L | Q | I | F | G | P | N | K | L | E | E | K |   |   |   |
| 6  | Ma04 | p12650 | MAA | I | S | L | E | E | I | K | N | E | V | D | L | E | R | V | I | P | V | D | E | V | F | E | Q | L | K | C | T | R | E | G | L | S | S | A | E | G | A | N | K | L | Q | I | F | G | P | N | K | L | E | E | K |   |
| 7  | Ma04 | p27230 | M   | - | N | I | S | L | E | A | I | K | N | E | V | D | L | E | R | V | I | P | V | D | E | V | F | E | Q | L | K | C | T | K | D | G | L | T | T | G | E | G | D | K | L | Q | I | F | G | P | N | K | L | E | E | K |
| 8  | Ma04 | p28850 | M   | - | N | I | S | L | E | A | I | K | N | E | V | D | L | E | R | V | I | P | V | D | E | V | F | E | Q | L | K | C | T | R | E | G | L | T | T | Q | A | E | G | L | A | I | F | O | H | N | K | L | E | E | K |   |
| 9  | Ma04 | p28860 | M   | - | N | I | S | L | E | A | I | K | N | E | V | D | L | E | R | V | I | P | V | D | E | V | F | E | Q | L | K | C | T | R | E | G | L | T | T | Q | A | E | G | L | A | I | F | O | H | N | K | L | E | E | K |   |
| 10 | Ma05 | p04210 | M   | - | S | I | S | L | E | E | I | K | N | E | V | D | L | E | R | I | P | V | D | E | V | F | E | Q | L | K | C | S | Q | E | L | T | T | A | E | G | E | Q | L | I | F | O | L | N | K | L | E | E | K |   |   |   |
| 11 | Ma05 | p19960 | M   | - | D | L | D | P | E | N | F | T | Q | S | M | D | L | E | R | I | P | V | D | E | V | F | E | Q | L | K | C | S | Q | E | L | T | T | A | E | G | E | Q | L | I | F | O | L | N | K | L | E | E | K |   |   |   |
| 12 | Ma05 | p25120 | M   | G | A | S | L | E | E | I | K | N | E | T | V | D | L | E | R | I | P | I | E | V | F | E | Q | L | K | C | T | K | E | G | L | T | S | Q | E | G | A | D | L | Q | I | F | G | P | N | K | L | E | E | K |   |   |
| 13 | Ma07 | p20790 | M   | - | S | V | D | M | E | A | V | L | K | E | A | V | D | L | E | N | I | P | V | D | E | V | F | E | Q | L | K | C | S | E | E | L | T | A | E | Q | Q | L | E | I | F | O | P | N | K | L | E | E | K |   |   |   |
| 14 | Ma09 | p10590 | M   | - | S | V | D | M | E | A | V | L | K | E | A | V | D | L | E | N | I | P | V | D | E | V | F | E | Q | L | K | C | S | E | E | L | T | A | E | Q | Q | L | E | I | F | O | P | N | K | L | E | E | K |   |   |   |
| 15 | Ma09 | p12800 | M   | G | A | S | L | E | Q | I | K | N | E | V | D | L | E | R | I | P | V | D | E | V | F | E | Q | L | K | C | S | E | E | L | T | S | R | P | E | Q | E | Q | L | I | F | O | P | N | K | L | E | E | K |   |   |   |

Show/hide alignment

Download alignment file (filtered): [FASTA](#)

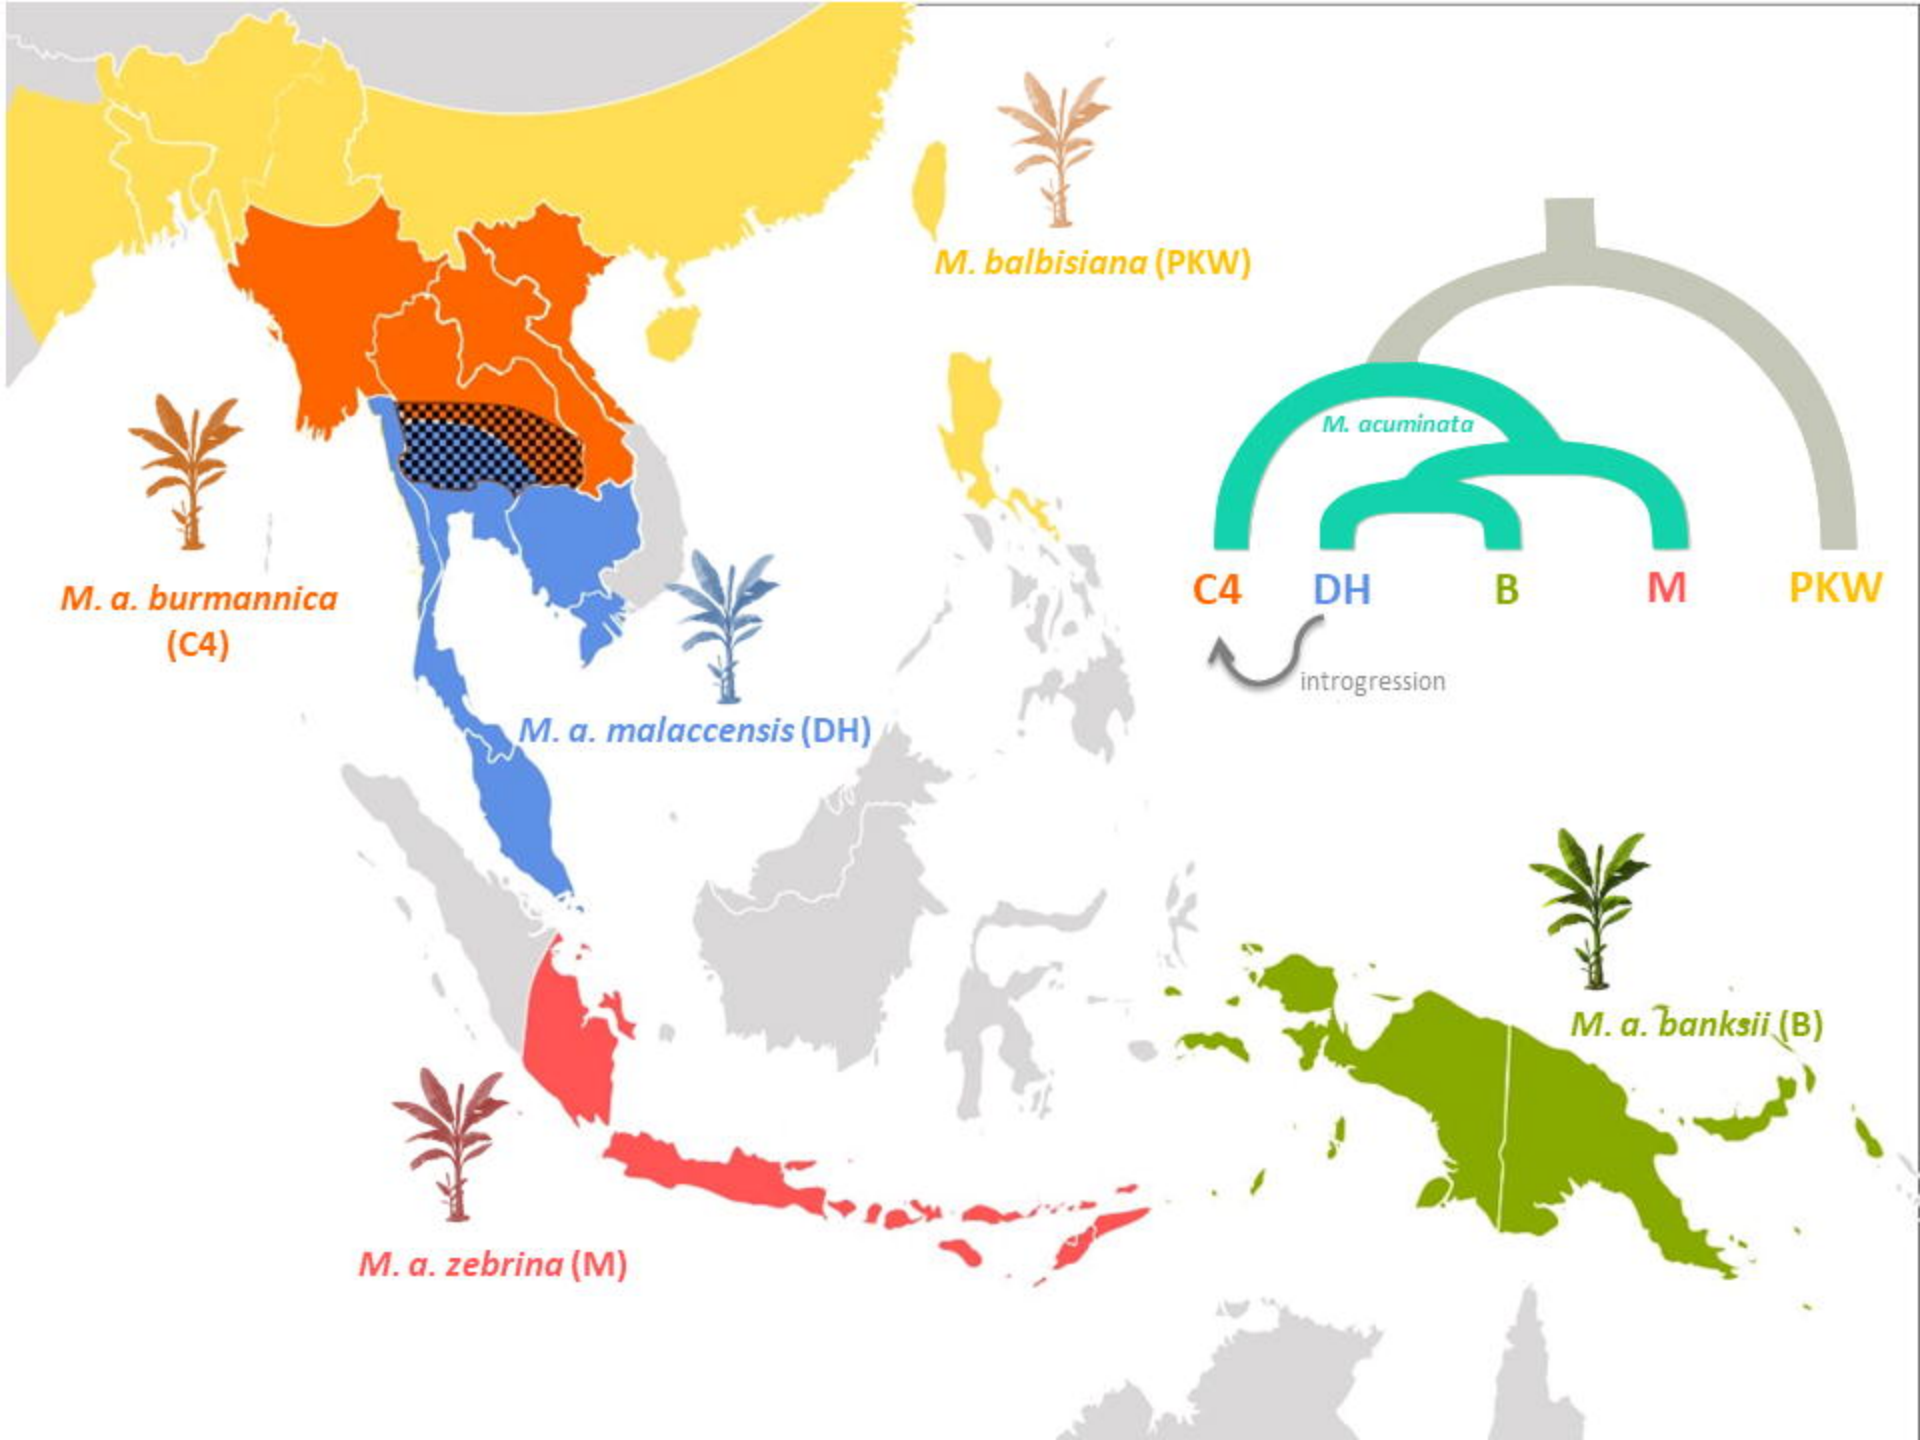

Source: https://www.biorxiv.org/content/biorxiv/early/2018/04/26/306605.full.pdf
